# Supplementary material for: Inhibition of solution crystal growth of ritonavir by cellulose polymers – factors influencing polymer effectiveness
Source: Royal Society of Chemistry journal article supplement (doi:10.1039/c2ce25515d), 2012-01-01
Supplement: c2ce25515d.pdf [file c2ce25515d.pdf]

## Supplementary Section

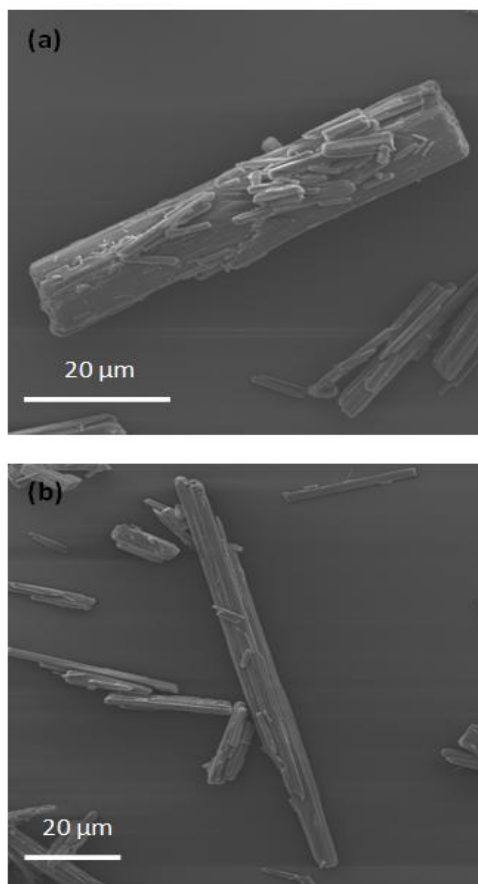

**Fig. S1** Seed crystals grown at  $S$  of 7.6 in (a) Presence and (b) Absence of CAP Adp 0.85 at a concentration 5 μg/mL. The Crystal in Figure (a) is rod-like, while the crystal in Figure (b) is needle-like.
